# Supplementary material for: Feasibility Aspects of Exploring Exercise-Induced Neuroplasticity in Parkinson's Disease: A Pilot Randomized Controlled Trial
Source: PubMed Central journal article supplement (PMC7132585; doi:10.1155/2020/2410863), 2020-03-25
Supplement: 2410863.f1.pdf [file 2410863.f1.pdf]

### Supplementary Material File 1

Absolute values on all tests at pre and post assessments

| <b>Outcome</b> median (min-max)                     | <b>HiBalance</b>  |                   | <b>Control</b>   |                   |
|-----------------------------------------------------|-------------------|-------------------|------------------|-------------------|
| <b>Physical performance tests</b>                   | <b>Pre (n=7)</b>  | <b>Post (n=7)</b> | <b>Pre (n=6)</b> | <b>Post (n=5)</b> |
| Mini-BESTest <sup>a</sup> , 0-28                    | 24.0 (21-27)      | 24.0 (21-27)      | 22.5 (19-25)     | 23.0 (12-26)      |
| MDS-UPDRS <sup>b</sup> III, 0-132                   | 35.0 (24-46)      | 35.0 (25-44)      | 32.5(22-52)      | 35.0 (22-56)      |
| Usual gait speed, m/s                               | 1.4 (1.2-1.6)     | 1.4(1.3-1.6)      | 1.3 (0.9-1.5)    | 1.3 (0.9-1.5)     |
| Gait speed, DT N-back, m/s                          | 1.4 (0.9-1.5)     | 1.2 (0.9-1.6)     | 1.0 (0.6-1.4)    | 1.1 (0.5-1.4)     |
| DT cost N-Back, %                                   | 7.2 (1.7 -27.2)   | 8.9 (6.3-30.2)    | 18.2(7.0 -35.8)  | 11.8(5.6-36.3)    |
| Gait speed, DT Audiostroop, m/s                     | 1.4 (0.9-1.6)     | 1.4 (0.8-1.5)     | 1.0 (0.5-1.5)    | 1.2(0.7-1.5)      |
| DT cost Audiostroop, %                              | 3.8 (-0.5-31.7)   | 5.8 (-4.2-35.5)   | 15.0 (-5.0-44.6) | 7.5 (3.3-23.0)    |
| Mean steps per day (control post n=3)               | 4256 (2087-10764) | 4405 (1337-5904)  | 5534 (1171-9597) | 6582 (6389-8333)  |
| <b>Self-reported measures</b>                       |                   |                   |                  |                   |
| ABC scale <sup>c</sup> , %                          | 85.0 (57.5-93.1)  | 90.0 (68.1-94.4)  | 74.7 (23.8-94.4) | 71.3 (58.6-95.6)  |
| Walk 12 <sup>d</sup> , 0-42                         | 9.0 (4.0-16.0)    | 4.0 (0-12)        | 17.0 (1-26)      | 15.0 (1-16)       |
| PDQ -39 <sup>e</sup> Summary Index, 0-100           | 20.5 (2.9-38.4)   | 11.8 (3.7-26.8)   | 20.5 (12.9-30.4) | 24.7(11.6-47.8)   |
| HADS <sup>f</sup> anxiety, 0-21                     | 7.0 (3-11)        | 6.0 (1-9)         | 5.0 (0-8)        | 6.0 (4-13)        |
| HADS <sup>f</sup> depression, 0-21                  | 3.0 (1-6)         | 3.0 (1-7)         | 2.0 (1-6)        | 4.0 (3-8)         |
| EQ5D <sup>g</sup> index, -0.594-1                   | 0.7 (0.7-0.8)     | 0.8 (0.2-1.0)     | 0.8 (0.7-0.9)    | 0.8 (0.7-0.9)     |
| EQ VAS <sup>h</sup> , 0-100                         | 75.0 (60-80)      | 70.0 (50-95)      | 72.5 (55-80)     | 75 (45-85)        |
| MDS-UPDRS <sup>b</sup> I, 0-52                      | 10.0 (3-16)       | 7.0 (5-21)        | 7.5 (5-15)       | 9.0 (4-15)        |
| MDS-UPDRS <sup>b</sup> II, 0-52                     | 15.0 (5-19)       | 9.0 (2-17)        | 13.0 (3-20)      | 12.0 (4-18)       |
| <b>Neuropsychological test battery</b>              |                   |                   |                  |                   |
| Trail Making Test <sup>i</sup> I, 0-150 sec         | 25.0 (18-32)      | 29.0 (15-38)      | 31.5 (20-55)     | 32.0 (19-38)      |
| Trail Making Test <sup>i</sup> II, 0-150 sec        | 62.0 (24-323)     | 39.0 (30-150)     | 45.0 (25-126)    | 68.0 (23-78)      |
| Trail Making Test <sup>i</sup> III, 0-150 sec       | 46.0 (37-99)      | 36.0 (27-99)      | 54.0 (27-143)    | 76.0 (19-115)     |
| Trail Making Test <sup>i</sup> IV, 0-240 sec        | 154.0 (64-240)    | 95.0 (68-207)     | 130.0 (88-240)   | 143 (65-210)      |
| Trail Making Test <sup>i</sup> V, 0-150 sec         | 38.0 (26-150)     | 37.0 (25-97)      | 56.0 (37-129)    | 54.0 (22-122)     |
| Color-Word Interference <sup>j</sup> I, 0-90 sec    | 33.0 (25-38)      | 32.0 (27-36)      | 40.5 (33-50)     | 34.0 (32-45)      |
| Color-Word Interference <sup>j</sup> II, 0-90 sec   | 25.0 (18-30)      | 24.0 (22-30)      | 28 (23-53)       | 28.0 (23-32)      |
| Color-Word Interference <sup>j</sup> III, 0-180 sec | 63.0 (54-77)      | 64.0 (54-94)      | 60.0 (52-153)    | 62.0 (50-164)     |
| Color-Word Interference <sup>j</sup> IV, 0-180 sec  | 72.0 (57-144)     | 68.0 (50-128)     | 73.0 (65-156)    | 82 (65-128)       |
| VF <sup>k</sup> , letter fluency, n words           | 48.0 (17-77)      | 50.0 (21-81)      | 38.0 (29-56)     | 35 (28-50)        |
| VF <sup>k</sup> , semantic fluency, n words         | 47.0 (25-57)      | 41.0 (25-53)      | 38.0 (22-43)     | 33.0 (22-39)      |
| VF <sup>k</sup> , semantic switching, n words       | 12.0 (10-16)      | 14.5 (11-19)      | 10.5 (4-15)      | 11.0 (7-14)       |
| VF <sup>k</sup> , semantic switching, n switches    | 14.0 (9-16)       | 14.5 (10-18)      | 9.5 (3-14)       | 10.0 (7-13)       |
| BVMT <sup>l</sup> total                             | 23.0 (8-28)       | 23.0 (12-33)      | 19.0 (6-31)      | 13.0 (8-29)       |
| BVMT <sup>l</sup> delayed recall                    | 10.0 (1-12)       | 8.0 (6-11)        | 9.0 (2-12)       | 7.0 (3-12)        |
| Digit Span <sup>m</sup> forward                     | 9.0 (5-12)        | 9.0 (6-11)        | 11.0 (6-14)      | 10.0 (8-13)       |
| Digit span <sup>m</sup> backward                    | 6.0 (5-10)        | 8.0 (6-12)        | 7.0 (6-10)       | 7 (5-9)           |
| RAVLT <sup>n</sup> total                            | 36.0 (29-64)      | 42.0 (29-63)      | 33.0 (23-48)     | 40.0 (37-51)      |
| RAVLT <sup>n</sup> delayed recall                   | 8.0 (4-10)        | 9.0 (3-14)        | 7.5 (0-8)        | 9.0 (1-10)        |
| <b>Speech and language assessment</b>               |                   |                   |                  |                   |
| Sound Pressure Level, dB(C)                         | 70.7 (68.1-75.3)  | 69.8 (64.8-75.0)  | 71.1 (68.0-75.3) | 73.6 (67.2-76.7)  |

|                                                                          |                  |                  |                  |                  |
|--------------------------------------------------------------------------|------------------|------------------|------------------|------------------|
| Dysarthria <sup>p</sup> mean score, 0-3                                  | 0.06 (0.01-0.60) | 0.04 (0.00-0.09) | 0.06 (0.02-0.43) | 0.02 (0.00.0.18) |
| Questionnaire on acquired speech disorder <sup>q</sup> , mean score, 0-3 | 0.61 (0.00.0.83) | 0.53 (0.05-0.97) | 0.61 (0.30-1.30) | 0.59 (0.28-1.42) |
| Word intelligibility, %                                                  | 98.5 (54.0-100)  | 98.0 (78.0-100)  | 95.1 (89.0-100)  | 98.0 (97.0-100)  |
| Sentence intelligibility, %                                              | 100 (75.0-100)   | 100 (83.0-100)   | 100 (94.0-100)   | 100 (98.0-100)   |

<sup>a</sup>A 14-item clinical test of balance function (maximum score=28), where higher scores indicate better balance function.

<sup>b</sup>Movement Disorder Society – Unified Parkinsons Disease Rating Scale; section I: Non-Motor Aspects of Experiences of Daily Living (0-52), section II: Motor Aspects of Experiences of Daily Living (0-52) , section III: Motor Examination (0-132). In all sections, a higher score indicates greater impairment.

<sup>c</sup> Activities-specific Balance Confidence scale, higher percentage indicates higher balance confidence

<sup>d</sup> Questionnaire on perceived walking difficulty scoring between 0-42 where higher scores indicate a greater impact on walking ability.

<sup>e</sup> Parkinsons Disease Questionnaire -39. Consists of eight subdomains and a summary Index. Scale between 0-100. Summary index scale where 0 indicates perfect health as assessed by the measure and 100 indicates worst health as assessed by the measure.

<sup>f</sup> Hospital Anxiety and Depression Scale, ranges from 0-21 with higher scores indicating higher levels of anxiety or depression respectively.

<sup>g</sup> EuroQol 5 Dimensions health status index varying between 1 and -.594, with 1 being interpreted as complete health and scores below 0 valued as health status worse than dead.

<sup>h</sup> EuroQol Visual Analogue Scale, score between 0 (worst imaginable health) and 100 (best imaginable health)

<sup>i</sup> Trail Making Test from Delis Kaplan Executive Function System™

<sup>j</sup> Color-Word Interference Test, from Delis Kaplan Executive Function System™

<sup>k</sup> Verbal fluency, from Delis Kaplan Executive Function System™

<sup>l</sup> Brief Visuospatial Memory Test

<sup>m</sup> Digit span from Wechsler Adult Intelligence Scale® - fourth edition, Swedish version

<sup>n</sup> Rey Auditory Verbal Learning Test, version 1.

<sup>o</sup>Brain-derived neurotrophic factor

<sup>p</sup> Mean score on dysarthria assessment according to Hartelius et al, with 0 meaning normal function and 3 meaning severe deviation or no function.

<sup>q</sup> Self-report questionnaire containing 30 statements with possible answers ranging from 0 (definitely false) to 3 (definitely true)
